# Supplementary material for: Identification of cancer drivers from tumor-only RNA-seq with RNA-VACAY
Source: bioRxiv or medRxiv preprint supplement (doi:10.1101/2022.05.10.491431), 2022-05-11
Supplement: Supplementary file [file media-2.pdf]

Supplementary Table 1. GTEx samples used to generate the panel of normals.

| <b>Biospecimen Repository Sample ID</b> | <b>Histological Type</b> |
|-----------------------------------------|--------------------------|
| GTEX-XV7Q-2626-SM-4BRVA                 | Adipose Tissue           |
| GTEX-XBED-2226-SM-47JYQ                 | Skin                     |
| GTEX-XV7Q-1426-SM-4BRWA                 | Ovary                    |
| GTEX-XYKS-1726-SM-4E3IO                 | Ovary                    |
| GTEX-XQ3S-0526-SM-4BOQA                 | Heart                    |
| GTEX-VUSG-2626-SM-4KKZI                 | Muscle                   |
| GTEX-T5JW-2026-SM-4DM63                 | Breast                   |
| GTEX-T5JC-1526-SM-4DM68                 | Kidney                   |
| GTEX-13CF3-2126-SM-5IFJP                | Breast                   |
| GTEX-11LCK-1926-SM-5A5KE                | Small Intestine          |
| GTEX-1339X-0626-SM-5IJER                | Lung                     |
| GTEX-Q734-0526-SM-2I3EH                 | Thyroid                  |
| GTEX-P4PQ-0526-SM-2HMKR                 | Lung                     |
| GTEX-OOBK-1626-SM-2HMKG                 | Muscle                   |
| GTEX-OXRK-0926-SM-2HMKP                 | Lung                     |
| GTEX-NPJ8-0011-R4a-SM-2HML3             | Brain                    |
| GTEX-N7MS-0011-R7a-SM-2HMKN             | Brain                    |
| GTEX-QDVN-2126-SM-2I3FR                 | Adipose Tissue           |
| GTEX-OHPM-0326-SM-2HMKT                 | Heart                    |
| GTEX-Q2AG-0126-SM-2HMLB                 | Skin                     |
